# Supplementary material for: Metabolic support protects oral mucosa from ferroptosis in radiation-induced mucositis
Source: Research Square preprint supplement (doi:10.21203/rs.3.rs-5617929/v1), 2025-01-31
Supplement: Supplementary file 1 [file e927faf49a72ab7cec9b7e07.docx]

**Supplementary Information**

**Metabolic support protects oral mucosa from ferroptosis in radiation-induced mucositis**

Weiwei Yu,1,6 Kai Jiao,2,6 Kaiyan Wang,1,6 Qianqian Wan,1,6 Xiang Li,1 Xinyi Hao,1 Meichen Wan,1 Yuxuan Ma,1 Jiao Wu,3 Qing Liu,1 Mei Shi,4 Franklin Tay,5 and Lina Niu1, *

**Table of Contents**

**SI-1. Methods**

**SI-2. Table S1. Substances used *in vivo*. Related to Methods [Supplementary Table 1]**

**SI-3. Table S2. Substances used *in vitro.* Related to Methods [Supplementary Table 2]**

**SI-4. Table S3. Antibodies experimental conditions. Related to Methods [Supplementary Table 3]**

**SI-5. Table S4. primer sequences. Related to Methods [Supplementary Table 4]**

**SI-1. Methods**

**Mice**

*Sat1-/-* (C57BL/6N-Sat1em1cyagen, stock number: KOCMP-20229-Sat1-B6N) mice were kindly gifted from Prof Zhao Wei (Department of Medical Immunology, School of Basic Medical Sciences, Shandong University).Male C57BL/6 mice of 6-8 weeks old were purchased from the Laboratory Animal Research Center of Air Force Medical University (AFMU). All animal experiments were performed with the approval of the Institutional Animal Care and Use Committee of AFMU.

**Human participants**

De-identified archival paraffin-embedded human tissue sections were provided by the Third Affiliated Hospital of AFMU. The specimens were harvested from the lingual mucosa adjacent to irradiated areas in patients with oral cancer. Unirradiated oral mucosal sections were obtained at least 5 cm away from the tumor margin of patients with tongue cancer via tissue biopsy. All samples were acquired under informed consent, ensuring that participants were fully aware of the research purpose and methodology. This study received formal approval from the Ethics Committee of the Third Affiliated Hospital of the AFMU (Ethical Approval Number: [KQYJ2024160]), and it was conducted in strict accordance with universally recognized ethical guidelines, notably the principles outlined in the Declaration of Helsinki.

**Cell culture**

Human oral epithelial cells and human oral fibroblasts were procured from Procell Life Science & Technology Co., Ltd. (Wuhan, China). Human oral keratinocytes (HOK-16B) were sourced from ZLZT Biotechnology Co., Ltd. (Wuhan, China). These cells were cultured in DMEM medium (Pricella, PM150210) supplemented with 10% fetal bovine serum (FBS, Pricella, 164210-50), 1% penicillin-streptomycin (Pricella, PB180120).

**Sample preparation for scRNA-seq**

Tongues were freshly excised from untreated mice or from mice 3 and 9 days post-radiation. Under sterile conditions, the tongues were washed twice in pre-chilled RPMI 1640 medium (Gibco, 11875119) supplemented with 0.04% bovine serum albumin (BSA, MACS, 1000076). After removing the muscle tissues on ice, the remaining tissues were finely minced into approximately 0.5 mm³pieces using surgical scissors. These pieces were then placed in a freshly prepared solution containing collagenase II (Gibco, 17018029) and hyaluronidase (0.5 mg/ml, Sigma-Aldrich, H1115000), and incubated at 37℃ in a water bath for 30-60 minutes, with gentle inversion every 5-10 minutes to ensure thorough enzymatic digestion. Following digestion, the cell suspensions were filtered once or twice through a 0.4 mm cell strainer (BD Biosciences) to remove any undigested tissue fragments. The filtrate was centrifuged at 300g for 5 minutes at 4℃. The cell pellet was resuspended in an appropriate volume of culture medium, to which an equal volume of red blood cell lysis buffer (MACS, 130-094-183) was added. The mixture was gently mixed and left to stand at 4℃ for 10 minutes to lyse any residual erythrocytes. Afterward, the suspension was centrifuged again at 300g for 5 minutes, and the supernatant was discarded. The cell pellet was washed once with culture medium, followed by another centrifugation at 300g for 5 minutes. The supernatant was removed, and the cell pellet was reconstituted in 100 μl of culture medium. Cell concentration and viability were determined using a Luna cell counter (Logos Biosystems).

**scRNA sequencing**

Single-cell isolation and sequencing were performed at OE Biotech Co. Ltd. (Shanghai, China). Freshly prepared single-cell suspensions were adjusted to a concentration of 700 to 1200 cells per microliter according to the manufacturer’s protocol. Library construction and instrument loading were carried out following the instructions provided with the Chromium Next GEM Single Cell 3’ Reagent Kits v3.1 (10x Genomics). The resulting libraries were sequenced on an Illumina NovaSeq 6000 platform using paired-end 150 bp reads for high-throughput sequencing.

**scRNA-seq data preprocessing and quality control**

The scRNA-seq data was processed using the Cell Ranger software pipeline (version 7.0.1) provided by 10x Genomics for demultiplexing of cellular barcodes. Reads were aligned to the genome and transcriptome, and subsampling was performed as necessary to generate normalized aggregated data across samples, resulting in a gene count versus cell contrast matrix. We utilized the R package Seurat1 (version 4.0.0) to handle the unique molecular identifier (UMI) count matrix. Quality control measures were applied to filter the cells based on the following criteria: a minimum number of detected genes greater than 200, a total UMI count exceeding 1,000, a log10(GenePerUMI) value above 0.7, a mitochondrial UMI ratio below 10%, and a hemoglobin gene expression level less than 5%. After applying these quality control standards, a total of 41,810 cells met the criteria and were retained for downstream analysis.

**Dimensionality reduction and cluster analysis**

The identification of highly variable genes was performed using the FindVariableFeatures function from the Seurat package (version 4.0.0). The expression profiles of these selected HVGs were then leveraged to apply mutual nearest neighbor (MNN) correction, a technique aimed at mitigating batch effects present within the single-cell expression data. Following batch effect correction, the multidimensional dataset was subjected to dimensionality reduction using UMAP, a powerful non-linear technique, to visualize the corrected data in a two-dimensional space, facilitating the interpretation and exploration of cellular heterogeneity and structure. Marker genes for each cluster were identified using the FindAllMarkers function with test.use = 'presto'. Differential gene expression analysis was conducted using the FindMarkers function, also with test.use = 'presto', setting a significance threshold of P < 0.05 and an absolute log2 fold change greater than 1.5 for differentially expressed genes. Enrichment analysis for these significantly differentially expressed genes was performed using hypergeometric tests for GO and Kyoto Encyclopedia of KEGG pathways. To quantify the activity of cell death gene signatures in epithelial and basal cells, the function "AddModuleScore" within Seurat was utilized.

**GSVA**

Firstly, background gene set files were retrieved and organized from the Kyoto Encyclopedia of Genes and Genomes (KEGG) database (https://www.kegg.jp/) utilizing the GSEABase package (version 1.44.0). To assign pathway activity estimates to individual cells, we applied GSVA2 using standard settings, as implemented in the GSVA package (version 1.30.0). Lastly, differential pathway activity between distinct groupings was quantified using the Linear Models for Microarray Data software package (version 3.38.3).

**CellChat analysis**

The cell communication analysis was performed using the CellChat3 (version 1.1.3) R package. First, we imported the normalized expression matrix to create the cellchat object with the createCellChat function. Secondly, the data was preprocessed with the identifyOverExpressedGenes, identifyOverExpressedInteractions and projectData functions using the default parameters. The computeCommunProb, filterCommunication (min.cells = 10) and computeCommunProbPathway functions were then used to determine any potential ligand-receptor interactions. Finally, the cell communication network was aggregated using the aggregateNet function.

**Trajectory analysis**

For inferring the differentiation trajectory of fibroblasts, we employed the Monocle2 package4 (version 2.9.0). The methodology entailed the following steps: Firstly, the transition from a Seurat object to a CellDataSet object was executed using the importCDS function. Subsequently, the differentialGeneTest function was applied to identify genes suitable for ordering the fibroblasts (ordering genes, qval < 0.01). Following this, dimensionality reduction and clustering were performed with the reduceDimension function. Finally, the differentiation trajectory was deduced by applying the orderCells function.

**Metabolic functional scoring analysis using scMetabolism**

Metabolic activity at the single-cell level was quantified using the scMetabolism package5 (version 0.2.1). Based on the conventional single-cell transcriptome expression matrix, the VISION algorithm was applied to score the metabolic activity of each fibroblast, culminating in activity scores for fibroblasts across each metabolic pathway. The software comes preloaded with human metabolic gene sets, encompassing 85 KEGG pathways and 82 REACTOME entries, which were orthologously translated to mouse genes for our analysis.

**SCENIC analysis**

The SCENIC analysis was run using the motifs database for RcisTarget and GRNboost (SCENIC6 version 1.2.4, which corresponds to RcisTarget version 1.10.0 and AUCell version 1.12.0) with the default parameters. In detail, transcription factor binding motifs over-represented on a gene list were identified with RcisTarget package. The activity of each group of regulons in each cell was scored by AUCell package (version 1.12.0).

To evaluate the cell type specificity of each predicted regulon, the regulon specificity score which was based on the Jensen-Shannon divergence, a measure of the similarity between two probability distributions was calculated. Specifically, the JSD (Jensen-Shannon divergence) between each vector of binary regulon activity overlaps with the assignment of cells to a specific cell type was calculated. The connection specificity index for all regulons was calculated with the scFunctions (https://github.com/FloWuenne/scFunctions/) package.

**Network Analysis Using STRING**

We uploaded the list of ferroptosis differential genes from basal cells to the STRING database (version 12.0), specifying the species as Mus musculus. Utilizing the default settings provided by STRING, we constructed a network that encompassed active interaction sources, including experimental data, database records, and predicted interactions. The resultant network was visualized within the STRING interface, facilitating the identification of clusters of interacting proteins or genes, which could suggest shared functional pathways or complexes. Our further scrutiny of this network enabled us to elucidate the biological roles of our proteins or genes of interest and their relational dynamics within the cellular context, providing insights into how these molecules might collaborate in mediating ferroptosis processes in basal cells.

**RIOM model**

To induce oral mucositis, we administered a single fractionated dose of 18 Gy radiation to the head of mic, with an RS2000 irradiator (Rad Source Systems) at a dose rate of 1.126 Gy per minute. To shield their bodies (excluding the head) during radiation, each mouse was guided into a customized mouse jig featuring a standardized snout positioning, with the fixture’s end closed to ensure precise and consistent alignment. Following the single-dose 18 Gy radiation, the irradiated mice were closely monitored on a daily basis. At the designated time points, the tongues of the mice were collected for further experiments. To observe the effects of radiation on the mucosa, C57BL/6 mice received vehicle or LIP-1 (5 mg/kg, HY-12726), spermidine (8.4 mg/kg, HY-B1776), spermine (8.4 mg/kg, HY-B1777), KGF-1(6.25mg/kg, HY-P70597), benzydamine mouthwash (0.15%, T8807) or DFMO (300 mg/kg, HY-B0744) locally by multipoint injection into the tongue (Table S1), with continuous treatment starting 7 days prior to radiation and continuing for 9 days post-radiation.

**Radiation-induced abdominal damage model**

The mice were randomly grouped (n = 6), including the control group (100 μL of saline), radiation group (100 μL of saline), radiation + spermidine group (10 mg/kg), radiation + amifostine group (10 mg/kg, HY-B0639). The spermidine and amifostine were injected 3 days in advance. Except for the control group, all other groups were exposed to 10 Gy radiation on the abdomen. A 5-mm-thick lead plate was used to shield the rest parts of the body. Mice were dosed daily for 7 days. The mice were euthanatized, and the colons, livers, lungs were collected at the end of the treatment period. The above tissue was washed with saline and fixed in 4% paraformaldehyde (Beyotime, P0099).

**Co-culture experiments**

We conducted a co-culture experiment involving fibroblasts and basal cells. Fibroblasts were seeded in the lower chamber, whereas basal cells were inoculated in the upper compartment of a Transwell insert equipped with a 0.4-micrometer polycarbonate filter (Corning, 3412). The ratio of epithelial cells to fibroblasts was maintained at 1:1, ensuring balanced interactions between these two cell types.

**RNA interference of gene expression**

Small interfering RNA (siRNA) targeting SAT1, ACSL4, or JUND (Table S4) was purchased from Beijing Tsingke Biotech Co., Ltd. Transfection of each siRNA (125 nmol/l) into cells was performed with lipofectamine (Invitrogen, L3000015).

**ROS and lipid peroxidation assay**

Twenty-four hours prior to radiation, cells were plated in fluorescence-compatible dishes or six-well plates, with or without pretreatment with drugs for 24 hours. Following an incubation period of 24 hours after radiation, fresh medium containing 4 μM CM-H2DCFDA (Invitrogen, C6827) for ROS measurement or 5 μM BODIPY 581/591 C11 dye (Invitrogen, D3861) for lipid peroxidation assessment was added to each well. After a 30-minute incubation in a humidified incubator at 37°C with 5% CO2, cells were rinsed with PBS, and the ROS levels produced by the cells were observed using a confocal microscope (Olympus, FV3000). To analyze lipid peroxidation levels, cells were subjected to trypsinization (Gibco, 15050065) to obtain a cell suspension, which was subsequently analyzed using a flow cytometer (BD FACSCelesta). This allowed for quantitative evaluation of lipid peroxidation within the cell population, providing insights into the oxidative stress status.

**Iron content analysis**

The intracellular iron content was quantified using Inductively Coupled Plasma Mass Spectrometry (ICP-MS) and the ferrous ion probe FerroOrange (Dojindo Laboratories, F374) (Table S3). Cells were plated in triplicate onto culture dishes 24 hours prior to radiation, with or without a 24-hour pre-treatment with drugs. After an additional 24-hour incubation period post-radiation, the cells were harvested for ICP-MS analysis to measure the total iron content. To specifically detect Fe2+, fresh medium containing 1 μM FerroOrange was added to each well. After a 30-minute incubation at 37°C in a humidified atmosphere with 5% CO2, the levels of ferrous ions produced by the cells were visualized using a confocal microscope (Olympus, model FV3000). This dual approach allowed for both the comprehensive quantification of total iron and the visualization of the labile ferrous iron pool within the cells, providing insights into the cellular iron homeostasis and potential iron-related oxidative stress following radiation and drug treatments.

**Flow Cytometric Sorting**

Tongues were freshly excised from untreated mice or from mice 3 and 9 days post-radiation. After removing the muscle tissues on ice, the remaining tissues were finely minced into pieces using surgical scissors. These pieces were then placed in a freshly prepared solution containing collagenase II (Gibco,17101015) and hyaluronidase (0.5 mg/ml, Sigma-Aldrich, H1115000), and incubated at 37℃ in a water bath for 30 - 60 minutes, with gentle inversion every 5-10 minutes to ensure thorough enzymatic digestion. Following digestion, the cell suspensions were filtered through a 70 μm cell strainer. The filtered cells were collected, centrifuged at 1000 rpm for 5 minutes, and the supernatant was discarded. The pellet was resuspended in PBS and stained with CD326 (Invitrogen, 17-5791-82) for 30 minutes at 4 °C. After washing twice with sorting buffer, the labeled cells were resuspended and sorted using a flow cytometer (Beckman Moflo XDP) based on their fluorescence intensity. Sorted cells were collected into pre-chilled tubes containing sorting buffer with 10% FBS (Pricella, 164210-50)

**Histology**

Tissue specimens were fixed, dehydrated and embedded to make sections at 4 μm thickness using a microtome (Leica, RM2016). Before staining, the sections were deparaffinized and rehydrated through a descending ethanol series (100% EtOH, 96% EtOH, ddH2O). H&E staining and Masson’s trichrome staining were performed according to the manufacturer’s protocols. Stained sections were examined under an optical microscope (Leica Microsystems, Wetzlar, Germany) and analyzed using ImageJ software (National Institutes of Health, Bethesda, MD).

For immunofluorescence staining, antigen retrieval was conducted using heat-mediated techniques with Tris-EDTA buffer (10 mM Tris, 1 mM EDTA, pH 9.0) in a pressure cooker (Retriever 2100, Electron Microscopy Sciences). Sections were blocked with 3% bovine serum albumin (BSA, MACS, 1000076) and incubated overnight at 4°C with primary antibodies (Table S3). On the second day, the sections were washed with PBS and incubated with fluorescently labeled secondary antibodies for 1 hour at room temperature in the dark. DAPI (Invitrogen, D1306) was used as a nuclear counterstain, and the slides were mounted with an antifade mounting medium (Beyotime, P0126) before being observed under a confocal microscope (Olympus, FV3000). Analysis was conducted using ImageJ software. The staining intensity was assessed for each channel, and a semi-quantitative analysis of relative fluorescence areas was conducted.

For immune-histological staining, endogenous peroxidase activity was blocked with 3% hydrogen peroxide solution (Angergech) for 25 minutes at room temperature in the dark. After washing with PBS, sections were covered with 3% BSA (MACS, 1000076) and incubated for 30 minutes at room temperature. Primary antibodies (Table S3) diluted in PBS were applied to the sections and incubated overnight at 4°C. The next day, sections were washed with PBS and incubated with secondary antibodies (horseradish peroxidase-conjugated) specific to the primary antibody species for 50 minutes at room temperature. DAB substrate (Servicebio, G1212) was applied to visualize the staining, and the reaction was stopped by washing with tap water. Counterstaining of nuclei was performed with hematoxylin (Servicebio, G1004), followed by dehydration and mounting. Analysis was conducted using ImageJ software. The percentage of positive staining was determined by calculating the ratio of stained area to the total area of the tissue of interest within predefined thresholds, counting all pixels below the threshold in the image.

**RNA isolation, Reverse Transcription, and Real Time PCR**

Total RNA extraction was performed using Trizol reagent (Invitrogen, 15596018CN), followed by reverse transcription utilizing the PrimeScript RT Master Mix (Takara, RR036A). The mRNA levels were quantified via real-time PCR using the TB Green Premix Ex Taq II kit (Takara, RR820A) on the ABI Quant Studio 5 Real-Time PCR System. Primer sequences employed for qRT-PCR are listed in Table S4. Individual mRNA levels were normalized to β-actin RNA levels for accurate expression quantification.

**ChIP–PCR**

Cells were seeded 24 hours before treatment, and then irradiated. These cells were then fixed with formaldehyde to cross-link protein-DNA complexes. Subsequently, sonication was performed to disrupt the cells and fragment the chromatin to an appropriate length. Following centrifugation to remove debris, the supernatant was immunoprecipitated by adding antibodies specific to the JUND transcription factor to bind the protein-DNA complexes. Protein A/G magnetic beads (Millipore, IP05) were utilized to capture the immune complexes, and washing was conducted to remove non-specific bindings. Finally, cross-links were reversed to release the DNA, which was then amplified via PCR to detect the target DNA fragments associated with the Sat1 gene (Table S3), thereby verifying the binding of the JUND protein (Invitrogen, CAT#PA1-834) to specific DNA sequences.

**Western blot assay**

Basal cells and fibroblasts were washed with pre-chilled PBS and subsequently scraped off in PBS. The collected cell pellets were lysed in lysis buffer (NCM Biotech, WB3100) supplemented with a mixture of protease and phosphatase inhibitors. Total protein concentrations in the cell lysates or media were quantified using a BCA assay kit (Thermo Fisher Scientific, 23225). Equal amounts of denatured lysates were resolved on a 10% SDS-PAGE gel and transferred onto PVDF membranes (Millipore, IPVH00010). The membranes were blocked in 4% skim milk at room temperature for 1 hour, then incubated with primary antibodies (Table S3) overnight at 4°C. Following this, they were probed with HRP-conjugated secondary antibodies (Proteintech; diluted 1:5000) and incubated at room temperature for 1 hour. Detection of the proteins was achieved using ECL substrate (Thermo Fisher Scientific, 32109) and the bands were visualized accordingly.

**Polyamine extraction and measurement**

A suspension of 1 × 106 cells was prepared in 100 μL of lysis buffer (NCM Biotech, WB3100). 50 μL of a 100 mM sodium bicarbonate solution was added to this suspension, followed by addition of 90 μL of a 20 mg/mL dansyl chloride solution (MCE, HY-D0017). After incubating the sample in the dark at 60°C for 20 minutes, 50 μL of a 1% aqueous trifluoroacetic acid solution was added. The samples were then centrifuged at 14,000 × g for 5 minutes in a precooled centrifuge (4°C) to pellet any cellular debris. The supernatant was carefully collected and stored at -80°C until it was ready for analysis by liquid chromatography-mass spectrometry.

**Cell survival assay**

Cell proliferation and survival capabilities were assessed using colony formation test, Calcein/PI cell viability and cytotoxicity detection kit (Beyotime, C2015S), and the Cell Counting Kit-8 (CCK-8, Beyotime, C0037).

For colony formation test, basal cells were seeded at a density of 1,000 cells per well in a six-well plate. Twenty-four hours post-seeding, cells were irradiated. Untreated cells received DMSO in their medium, while irradiated cells were treated with medium containing DMSO, 5 μM Ferr-1(HY-100579), 5 μM Z-VAD (HY-16658B), 2 μM Nec-1s (HY-113100), or 5 μM VX-765 (HY-13205) (Table S2). Culturing medium was changed every other day for a period of 10-14 days. Cells were then fixed in methanol and stained with crystal violet solution (Beyotime, C0121). Colony counts were obtained from three wells per experiment and averaged. Relative survival rates were the ratio of the absolute survival rate (total number of colonies per well) at each radiation dose to the absolute survival rate of unirradiated cells.

For Calcein/PI cell viability and cytotoxicity detection, cells were seeded at a density of 1 × 106 cells per well in a 24-well plate. Twenty-four hours post-seeding, cells were irradiated. After another 24 hours, 250 μL of Calcein AM/PI detection working solution was added to each well and incubated at 37°C in the dark for 30 minutes. Fluorescence was observed under a fluorescence microscope (Olympus, FV3000), with Calcein AM displaying green fluorescence (Ex/Em = 494/517 nm) and PI showing red fluorescence (Ex/Em = 535/617 nm).

To measure cell viability and proliferation, cells were seeded at a density of 2,000 cells per well in a 96-well plate. Medium was supplemented with DMSO or spermine/spermidine (Table S2) at concentrations of 10, 20, 30, 40, 50, 60, 70, 80, 90, and 100 nM, or putrescine (MCE, HY-Y1781) at concentrations of 20, 40, 60, 80, 100, 200, 300, 400, and 500 nM for a 24-hour pre-treatment before radiation. Twenty-four hours post-radiation, 10 μL of CCK-8 solution was added to each well, and cells were incubated for an additional 2-4 hours in the cell culture incubator. Absorbance was measured using a microplate reader (Thermo Scientific) to determine cell viability and proliferation.

**TEM observation**

Tongue tissues from mice were fixed in 2.5% glutaraldehyde dissolved in phosphate buffer (0.01 M, pH = 7.4). Post-fixation was carried out in 1% osmium tetroxide, followed by dehydration through a graded series of ethanol solutions. The samples were then infiltrated with propylene oxide and embedded in epoxy resin. Ultrathin sections, approximately 90 nanometers thick, were cut and stained with uranyl acetate and lead citrate. Observations were made using a JEM-1230 Transmission Electron Microscope (TEM, JEOL, Tokyo, Japan) operated at 110 kV, providing ultrastructural details of the tissue at high resolution.

**Statistical analysis**

Data from three or four independent experiments are presented as mean values ± standard deviation (SD). Statistical analyses were performed using GraphPad Prism 9.0 (GraphPad Software, San Diego, CA). Normal distribution of all quantitative measurements was verified. Group differences were assessed using Student’s t-tests, one-way ANOVA, followed by Holm-Šidák post hoc tests for multiple comparisons. To ensure the validity of the observations, quantitative experiments were replicated at least three times. Statistical significance was denoted as follows: **** indicates p < 0.0001, *** indicates p < 0.001, ** indicates p < 0.01, * indicates p < 0.05, and ns represents no statistical significance (p > 0.05). These criteria provided a rigorous framework for interpreting the results and drawing conclusions based on the data obtained from the experimental replicates.

**SI-2. Table S1. Substances used *in vivo*. Related to STAR★Methods [Supplementary Table 1]**

| *IN VIVO* | STOCK | IN | USE | APPLY | Prior to use dissolve in | COMPANY | # | FREQUENCY |
| --- | --- | --- | --- | --- | --- | --- | --- | --- |
| Liproxstatin-1 | 10mM | DMSO | 10 mg/kg/day | LM inj. | 10% DMSO 40% PEG300 5% Tween-80 45% Saline | MCE | HY-12726 | 1x/d for 16 days |
| Spermine | 10mM | ddH2O | 8.4 mg/kg/day | LM inj. | PBS | MCE | HY-B1777 | 1x/d for 16 days |
| Spermidine | 10mM | ddH2O | 8.4 mg/kg/day | LM inj. | 10% DMSO 40% PEG300 5% Tween-80 45% Saline | MCE | HY-B1776 | 1x/d for 16 days |
| Putrescine | 10mM | ddH2O | 8.4 mg/kg/day | LM inj. | 10% DMSO 40% PEG300 5% Tween-80 45% Saline | MCE | HY-Y1781 | 1x/d for 16 days |
| DFMO | 10mM | ddH2O | 300 mg/kg/day | LM inj. | ddH2O | MCE | HY-B0744 | 1x/d for 16 days |

LM inj.: Local mucosal injection

**SI-3. Table S2. Substances used *in vitro.* Related to Methods [Supplementary Table 2]**

| *IN VIVO* | STOCK | IN | USE | COMPANY | preincubation | # |
| --- | --- | --- | --- | --- | --- | --- |
| Ferrostatin-1 | 10mM | DMSO | 5 μM | MCE | 24h | HY-100579 |
| N-acetyl-L-cysteine | 10mM | ddH2O | 2 μM | MCE | 24h | HY-113100 |
| VX-765 | 10mM | DMSO | 5 μM | MCE | 24h | HY-13205 |
| Z-VAD-FMK | 10mM | DMSO | 5 μM | MCE | 24h | HY-16658B |
| Spermine | 10mM | ddH2O | ≤100nM | MCE | 24h | HY-B1777 |
| Spermidine | 10mM | ddH2O | ≤100nM | MCE | 24h | HY-B1776 |
| Putrescine | 10mM | ddH2O | ≤500nM | MCE | 24h | HY-Y1781 |

**SI-4. Table S3. Antibodies experimental conditions. Related to Methods [Supplementary Table 3]**

| ANTIBODY | COMPANY | CAT. NO. # | HOST SPECIES/ LABEL | DILUTION | USE |
| --- | --- | --- | --- | --- | --- |
| PCNA (sc-56) | Santa Cruz Biotech | B0323 | Mouse | 1:2000 | IF |
| KRT14 (MA5-11599) | Invitrogen | YB372387 | Mouse | 1:500 | IHC, IF |
| Vimentin (60330-1-Ig) | Proteintech | 10026714 | Mouse | 1:300 | IF |
| CD45 (GB113886) | Servicebio | S48022042501 | Rabbit | 1:300 | IF |
| CD31 (GB113151) | Servicebio | AC240104193 | Rabbit | 1:300 | IF |
| KRT19 (GB12197-100) | Servicebio | 10D6G12 | Mouse | 1:300 | IHC |
| ACSL4 (A16848) | Abclonal | 00125165 | Rabbit | 1:100 | IF |
| PTGS2 (AB15191) | Abcam | 1021476-6 | Rabbit | 1:100 | IF |
| ALOX15 (sc-133085) | Santa Cruz Biotech | B1823 | Mouse | 1:50 | IF |
| Spermine (AB26975) | Abcam | 1062331-2 | Rabbit | 1:300 | IF |
| ODC1 (28728-1-AP) | Proteintech | 00118403 | Rabbit | 1:400 | IF |
| JUND (83134-6-RR) | Proteintech | 23007399 | Rabbit | 1:200 | IF, WB |
| Phospho-Histone H2AX (AP0687) | Abclonal | 3523072802 | Rabbit | 1:100 | IF |
| SAT1 （10708-1-AP） | Proteintech | 00146659 | Rabbit | 1:500 | WB |
| ACSL4 (22401-1-AP) | Proteintech | 00125165 | Rabbit | 1:1000 | WB |
| α-Tubulin (11224-1-AP) | Proteintech | 00131949 | Rabbit | 1:3000 | WB |
| β-actin (sc-47778) | Santa Cruz Biotech | F1323 | Mouse | 1:200 | WB |
| JUND (PA1-834**)** | Invitrogen | ZE400273 | Rabbit | 1:50 | CHIP |
| DAPI (D1306) | Invitrogen | 2641884 |  |  | IF |
| Goat anti-Mouse Secondary Antibody with Alexa Fluor™ 488 (Ab150113) | Abcam | GR3419505-1 | Goat | 1:500 | 2nd |
| Goat anti-Rabbit Secondary Antibody with Alexa Fluor™ 568 (GB21303) | Servicebio | AC2311259002 | Goat | 1:500 | 2nd |
| HRP-conjugated Affinipure Goat Anti- Mouse IgG (H+L) (SA00001-1) | Proteintech | 20000886 | Goat | 1:5000 | 2nd |
| HRP-conjugated Affinipure Goat Anti-Rabbit IgG (H+L) (SA00001-2) | Proteintech | 20001097 | Goat | 1:5000 | 2nd |
| HRP-conjugated Goat Anti-Mouse IgG （H+L）(GB23301) | Servicebio | AC231007001 | Goat | 1:500 | 2nd |
| CD326 (17-5791-82) | Invitrogen | 2686502 | Mouse | 1:500 | FACS |

IF: immunofluorescence; IHC immunohistochemistry; WB: Western Blot

**SI-5. Table S4. primer sequences. Related to Methods [Supplementary Table 4]**

| TARGET | FORWARD | REVERSE |
| --- | --- | --- |
| β-actin | 5 ́-CAT CCG TAA AGA CCT CTA TGC CAA C-3 ́ | 5 ́-ATG GAG CCA CCG ATC CAC A-3 ́ |
| qPCR-Sat1 | 5 ́-GGC TAA ATT TAA GAT CCG TCC A-3 ́ | 5 ́-CAT GTA TTC ATA TTT AGC CAG TTC CTT-3 ́ |
| qPCR-ACSL4 | 5 ́-GCC ATG GAA GCT GAA ATA CTG AAA G-3 ́ | 5 ́-GAA GGC ATC TGT TAC CAA ACC AGT C-3 ́ |
| qPCR-SLC39A14 | 5 ́-CCG ATA TGT TCC CTG AGA TG-3 ́ | 5 ́-GAG GAC CAG CAT AAT GGA GAA G-3 ́ |
| Sat1_siRNA_1 | 5 ́-GAC UGU UCA AGA UCG ACA A -3 ́ | 5 ́-UUG UCG AUC UUG AAC AGU C -3 ́ |
| Sat1_siRNA_2 | 5 ́-GGU UGC AGA AGU GCC GAA A -3 ́ | 5 ́-UUU CGG CAC UUC UGC AAC C -3 ́ |
| Sat1_siRNA_3 | 5 ́-GGA UCA GAA AUU CUG AAG A -3 ́ | 5 ́-UCU UCA GAA UUU CUG AUC C -3 ́ |
| ACSL4_siRNA_1 | 5 ́-GCA AUA AUC CUG CUA UGG A -3 ́ | 5 ́-UCC AUA GCA GGA UUA UUG C -3 ́ |
| ACSL4_siRNA_2 | 5 ́-GAA GGC GGU UAU ACA AUU A -3 ́ | 5 ́-UAA UUG UAU AAC CGC CUU C -3 ́ |
| ACSL4_siRNA_3 | 5 ́-GGA UAU UCU UCU CCG CUU A -3 ́ | 5 ́-UAA GCG GAG AAG AAU AUC C -3 ́ |
| JUND_siRNA_1 | 5 ́-CCG GCA GCA UGA UGA AGA A -3 ́ | 5 ́-UUC UUC AUC AUG CUG CCG G-3 ́ |
| JUND_siRNA_2 | 5 ́-GCC UCA UCA UCC AGU CCA A-3 ́ | 5 ́-UUG GAC UGG AUG AUG AGG C-3 ́ |
| JUND_siRNA_3 | 5 ́-GGA GGA UUU ACA CAA GCA G-3 ́ | 5 ́-CUG CUU GUG UAA AUC CUC C-3 ́ |
| ODC1_siRNA_1 | 5 ́-CGA UAA GGA UGC GUU CUA U-3 ́ | 5 ́-AUA GAA CGC AUC CUU AUC G-3 ́ |
| ODC1_siRNA_2 | 5 ́-GGU UAU CUA UGC AAA UCC U-3 ́ | 5 ́-AGG AUU UGC AUA GAU AAC C-3 ́ |
| ODC1_siRNA_3 | 5 ́-CGC UUG CAG UCA ACA UCA U-3 ́ | 5 ́-AUG AUG UUG ACU GCA AGC G-3 ́ |
| ChIP-Sat1 | 5 ́-GAATCCAAAGACCTTACCTTCG-3 ́ | 5 ́-TTCTGACTTCGGTTGCTGTT-3 ́ |

**REFERENCE:**

1. Hao, Y. et al. Integrated analysis of multimodal single-cell data. *Cell* **184***，*3573-3587.e29 (2021).
2. Hänzelmann, S., Castelo, R., & Guinney, J. GSVA: gene set variation analysis for microarray and RNA-Seq data. *BMC Bioinformatics* **14**, 7 (2013).
3. Jin S. et al. Inference and analysis of cell-cell communication using CellChat. *Nat Commun.* **12**, 1088. (2021).
4. Trapnell, C. et al The dynamics and regulators of cell fate decisions are revealed by pseudotemporal ordering of single cells. *Nat Biotechnol.* **32**, 381-386. (2014).
5. Wu, Y. et al. Spatiotemporal immune landscape of colorectal cancer liver metastasis at single-cell level. *Cancer Discov.* **12**, 134-153 (2022).
6. Aibar S. et al. SCENIC: single-cell regulatory network inference and clustering. *Nature methods* **14***.* 1083-1086 (2017).
7. Fornes O. et al. JASPAR 2020: update of the open-access database of transcription factor binding profiles. *Nucleic Acids Res* **48**, D87-D92. (2019).
